# Supplementary material
Source: publisher figshare collection journal article supplement (https://gsajournals.figshare.com/articles/dataset/_/9762899)
Supplement: Supplementary file 1 [file 1]

Archive with 2 entries (2 files):
- FigureS1.pdf
- FigureS2.pdf
