# Supplementary material
Source: publisher figshare collection journal article supplement (https://gsajournals.figshare.com/articles/dataset/_/9762899)
Supplement: Supplementary file 1 [file 1 › FigureS1.pdf]

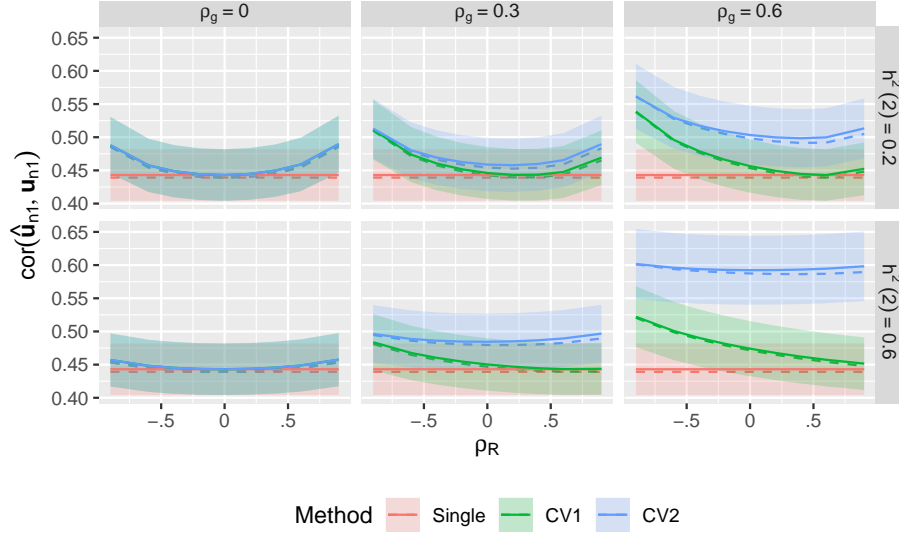

Figure 1: **Figure S1. Actual prediction accuracy of single-trait and multi-trait prediction methods in simulated data when  $\mathbf{G}$  and  $\mathbf{R}$  are known.** 500 simulations were run for each heritability of the secondary trait ( $h_2^2 = \{0.2, 0.6\}$ ), and each combination of genetic and non-genetic correlation between the two traits ( $\rho_g = \{0, 0.3, 0.6\}$ ,  $\rho_R = \{-0.6, -0.4, -0.2, 0, 0.2, 0.4, 0.6\}$ ), all with  $h_1^2 = 0.2$ . For each simulation, we used the 900 training individuals to fit linear mixed models (either single or multi-trait) conditioning on the true values for  $\mathbf{G}$  and  $\mathbf{R}$ , predicted the genetic values of the 100 testing individuals, and then measured the Pearson's correlation between the predicted ( $\hat{\mathbf{u}}_{n1}$ ) and true ( $\mathbf{u}_{n1}$ ) genetic values. In the CV1 method, we used only information on the testing individuals to calculate  $\hat{\mathbf{u}}_{n1}$ . In the CV2 method, we used the training individuals to calculate  $\hat{\mathbf{u}}_o$  and combined this with the observed phenotypes for the secondary trait on the testing individuals ( $\mathbf{y}_{n2}$ ). Curves show the average correlation for each method across the 500 simulations. Ribbons show  $\pm 1.96 \times SE$  over the 500 simulations. Dashed lines show analytical calculations of the expected correlation given one representative training:validation data partition.
