# Supplementary material
Source: publisher figshare collection journal article supplement (https://gsajournals.figshare.com/articles/dataset/_/9762899)
Supplement: Supplementary file 1 [file 1 › FigureS2.pdf]

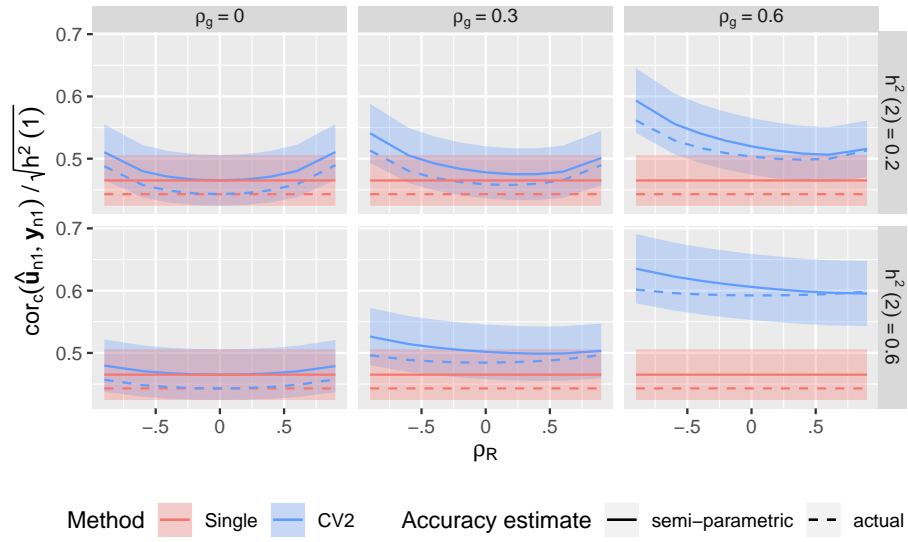

Figure 2: **Figure S2. Estimated prediction accuracies and model selection accuracies for single-trait and multi-trait prediction methods after semi-parametric correction when G and R are known.** Ribbons show  $\pm 1.96 \times SE$  over the 500 simulations. Dashed lines show the mean actual prediction accuracy:  $cor(\hat{\mathbf{u}}_{n1}, \mathbf{u}_{n1})$ .
